# Supplementary material for: Older working adults in the HEAF study are more likely to report loneliness after two years of follow-up if they have negative perceptions of their work quality
Source: Springer Nature journal article supplement (doi:10.1186/s12889-021-10610-5), 2021-03-23

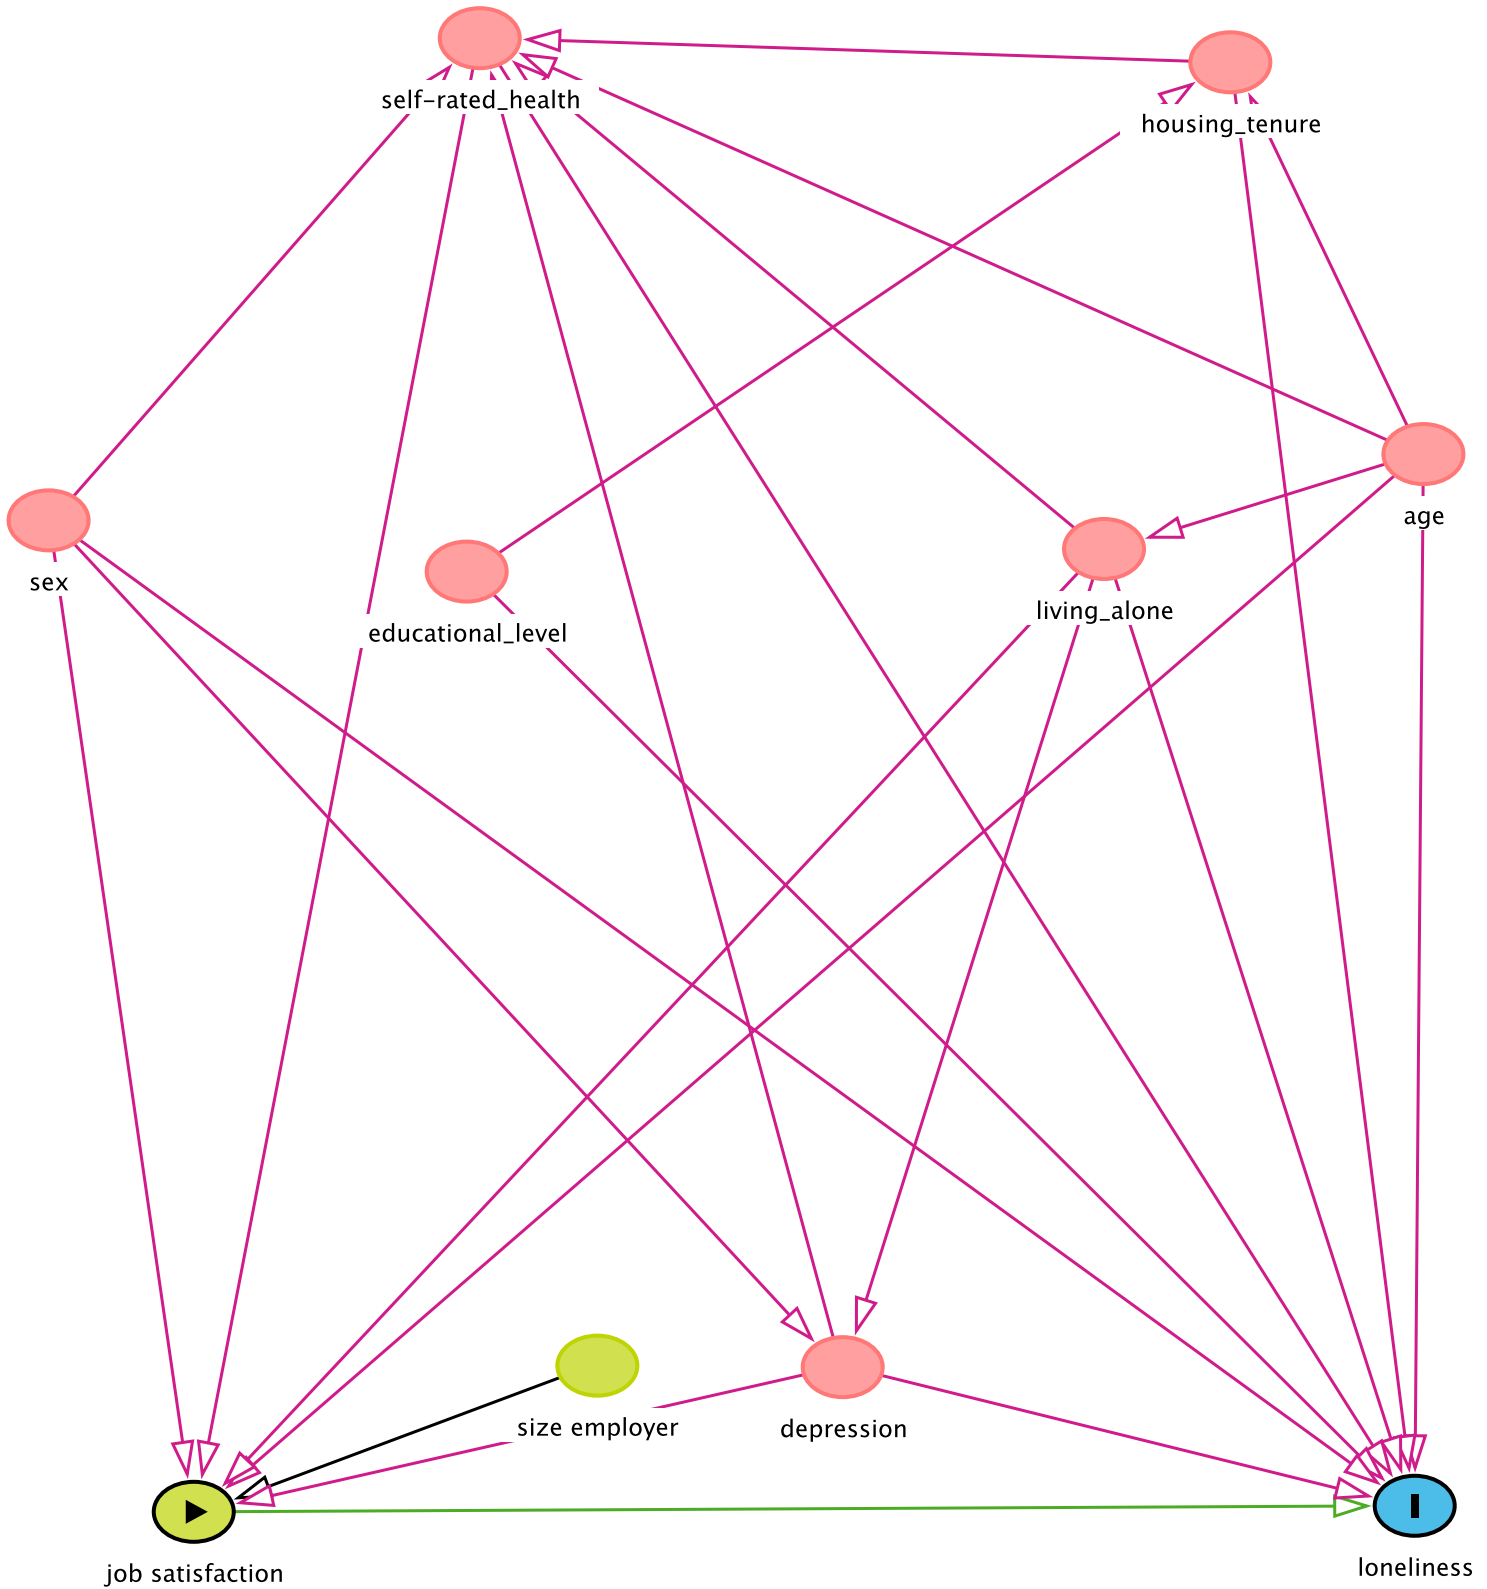

Supplement: MOESM1 [file 18995536]
